1 **Despite reproductive interference, the net outcome of reproductive interactions**

2 **among spider mite species is not necessarily costly**

3 Salomé H. Clemente, Inês Santos, Rita Ponce, Leonor R. Rodrigues, Susana A. M.

4 Varela\* and Sara Magalhães\*<sup>1</sup>

5 [salome.hc@gmail.com](mailto:salome.hc@gmail.com), [inesflsantos@gmail.com](mailto:inesflsantos@gmail.com), [anaritaponce@gmail.com](mailto:anaritaponce@gmail.com),

6 [leonor.rodrigues89@gmail.com](mailto:leonor.rodrigues89@gmail.com), [savarela@fc.ul.pt](mailto:savarela@fc.ul.pt), [snmagalhaes@fc.ul.pt](mailto:snmagalhaes@fc.ul.pt)

7 \*co-last authorship

8 cE3c – Centre for Ecology, Evolution and Environmental Changes

9 Faculdade de Ciências da Universidade de Lisboa

10 Edifício C2, 3º Piso

11 Campo Grande

12 1749-016 Lisbon

13 Portugal

14 <sup>1</sup>: [snmagalhaes@fc.ul.pt](mailto:snmagalhaes@fc.ul.pt)

15

16

17

18 **Abstract**

19 Reproductive interference is considered a strong ecological force, potentially leading  
20 to species exclusion. This supposes that the net effect of reproductive interactions is  
21 strongly negative for one of the species involved. Testing this requires a  
22 comprehensive analysis of interspecific reproductive interactions, accounting for the  
23 order and timing of mating events, and for their effects on either fertility or fecundity.  
24 To this aim, we measured reproductive interactions between a focal species,  
25 *Tetranychus urticae*, and an invasive (*T.evansi*) and a resident (*T. ludeni*) species,  
26 varying the mating sequence and interval, and measuring the effect of such crosses on  
27 fecundity and offspring sex ratio (a measure of fertility, as these species are  
28 haplodiploid). We found that mating with heterospecifics affected fecundity and sex  
29 ratio negatively, but also positively, depending on the species involved, and on the  
30 order and timing of mating events. Overall, the net effect of reproductive interactions  
31 was weak despite strong effects of particular events. In natural situations the outcome  
32 of reproductive interactions will thus hinge upon the frequency of each event.

33

34 **Keywords:**

35 Biological invasions, sperm precedence, *Tetranychus*, reproductive interactions,  
36 mating.

37

## 38 **Introduction**

39 Reproductive interference, that is, any kind of sexual interaction between two species  
40 that diminishes the fitness of at least one of them (Gröning and Hochkirch 2008, Kishi  
41 et al. 2009, Burdfield-Steel and Shuker 2011), may have severe effects on the outcome  
42 of species interactions. Indeed, theory predicts that reproductive interference may  
43 contribute to species exclusion more often than resource competition (Gröning and  
44 Hochkirch 2008, Kishi et al. 2009, Kishi and Nakazawa 2013). For example, it has been  
45 posited that reproductive interference may underlie the success of some invasive  
46 species (e.g. Nishida et al. 2012).

47       Most studies of reproductive interference concern the fitness outcome of  
48 interspecific matings of two species that do not produce viable hybrids (Gröning and  
49 Hochkirch 2008). In this case, the reproductive effects of the interspecific interaction  
50 will be expressed only when organisms mate with both conspecifics and  
51 heterospecifics (as mating with conspecifics alone will yield no offspring). Moreover,  
52 clearly evaluating the effects of reproductive interference on exclusion in polyandrous  
53 species necessitates measuring all possible combinations of mating order (*i.e.*, whether  
54 heterospecific matings occur before or after conspecific ones) and timing (*i.e.*, the  
55 interval between mating events) between pairs of species. It is also important to test  
56 whether reproductive interactions affect fecundity (egg production) or fertility (egg  
57 fertilization). This information can then be integrated to predict the net outcome of  
58 reproductive interactions between species. Despite the many studies on reproductive  
59 interference, none has yet applied this approach. Indeed, some studies attempt to  
60 predict how reproductive interference affects species exclusion, but do so by focussing  
61 on some sequence events only. For example, Takafuji (1997) used a Lotka-Volterra

62 modified model to predict the effect of reproductive interference between two mite  
63 species (*Panonychus citri* and *P. mori*) on species exclusion, but they used only one  
64 possible combination of mating interactions between species. In contrast, other  
65 studies consider different orders of mating events (eg, Kyogoku and Nishida 2013), but  
66 do not integrate this information to generate a prediction concerning the net effect of  
67 reproductive interactions on species distributions.

68 Here, we aimed at testing how the outcome of different mating events among  
69 species may affect their life-history traits, using spider mites, a group where  
70 reproductive interference has been frequently observed (Collins and Margolies 1994;  
71 Takafuji et al. 1997; Ben-David et al. 2009, Sato et al. 2014). Spider mites are  
72 haplodiploid, hence the distinction between fecundity and fertilization effects can be  
73 made given that fertilized eggs result in female offspring and unfertilized eggs in male  
74 offspring. Thus, fertilization failures can be detected by a reduction in the proportion  
75 of female offspring, whereas impairment of egg production is detected by a reduction  
76 in the total number of offspring.

77 We used a system composed of one focal species, *Tetranychus urticae*, in  
78 sexual heterospecific interactions with another resident species, *T. ludeni*, and an  
79 invasive species, *T. evansi*. These three herbivorous species co-occur in the  
80 Mediterranean region and are often found on the same host plant (Escudero and  
81 Ferragut 2005, Boubou et al. 2012, Godinho et al. 2016). Whereas *T. urticae* and *T.*  
82 *ludeni* are resident species, *T. evansi* has only recently invaded the European continent  
83 (Boubou et al. 2012). Whereas information on the interaction between *T. urticae* and  
84 *T. ludeni* is as yet lacking, heterospecific matings have been observed between *T.*  
85 *urticae* and *T. evansi* (Sato et al. 2014, 2016, Clemente et al. 2016). Moreover, *T. evansi*

86 can exclude *T. urticae* on tomato plants (Sarmiento et al. 2011a), a result that  
87 correlates with field observations (Ferragut et al. 2013). Finally, a recent study has  
88 shown that, in competition with *T. evansi*, the population growth of *T. urticae* is more  
89 severely affected when plants are colonized by virgin females than when plants are  
90 colonized by mated females, suggesting that reproductive interference may be  
91 responsible for the species distribution patterns observed (Sato et al. 2014).

92 To postulate hypotheses concerning the consequences of heterospecific  
93 matings, it is crucial to understand within-species reproductive behaviour. *T. urticae*,  
94 the focal species, exhibits first male sperm precedence, with second matings being  
95 sometimes effective if they occur within the 24 hours following the first (Helle 1967).  
96 However, females that mate multiple times with conspecific males, after a 24h interval  
97 between matings, produce fewer fertilized offspring (*i.e.*, females) (Macke et al. 2012),  
98 suggesting that sperm displacement after 24h is possible. Here, we hypothesize that  
99 mating order and the mating interval will affect the outcome of reproductive  
100 interference in *T. urticae*. Also, given that *T. evansi*, the invasive species, displaces *T.*  
101 *urticae*, unlike *T. ludeni*, we expect the former to exert stronger effects than the latter.  
102 To this aim, we performed crosses between *T. urticae* and the two other species at  
103 different time intervals and with different mating orders, and measured the  
104 consequences for the two species involved in the cross.

105

## 106 **Material and Methods**

### 107 **Stock Cultures**

108 The mite species used in this study were collected in Carregado (39.022260, -  
109 8.966566), Portugal, and all laboratory populations were established from an initial

110 pool of 300 mated females. The laboratory population of *T. urticae* was collected on  
111 tomato plants (*Solanum lycopersicum*) in May 2010, that of *T. evansi* on *Physalis*  
112 *angulata* in May 2012 and that of *T. ludeni* on tomato in September 2012. The  
113 populations of *T. evansi* and *T. ludeni* became extinct in August 2012 and May 2013,  
114 respectively, being subsequently replaced with populations from the same location,  
115 both collected in *Datura stramonium* plants. Both populations of *T. evansi* and *T.*  
116 *ludeni* were used in the experiments.

117       Species identity was confirmed through polymerase chain reaction–restriction  
118 fragment length polymorphism (PCR–RFLP) of the ITS2 region (Hurtado et al. 2008), on  
119 approximately 50 females of each population. Total genomic DNA was extracted from  
120 each individual spider mite using the Sigma-Aldrich GenElute™ Mammalian Genomic  
121 DNA Miniprep Kit, following manufacturer’s instructions, except for the elution  
122 volume, which we set to 20µL of RNase free water (Qiagen NV, Venlo, The  
123 Netherlands) to increase the concentration of DNA obtained from this very small  
124 animal (c.a. 300µm long).

125       Adult females from populations used in this experiment were screened for  
126 *Wolbachia* using the primers *wsp* (*Wolbachia*-specific primers) 81F and 691R (Braig et  
127 al. 1998). We did this to avoid potential cytoplasmic incompatibility as a confounding  
128 factor in our measurements. PCR assay procedures were as described in Breeuwer  
129 (1997). Results were positive for *Wolbachia* infection and all spider mite populations  
130 were thus treated by placing adult females in detached bean leaves with tetracycline  
131 (0.025% w/v) for three consecutive generations, then absence of *Wolbachia* was  
132 confirmed using the same protocol as above. Other endosymbionts tested

133 (Arsenophorous, Rickettsia, Spiroplasma and Cardinium) were absent from these  
134 populations.

135 Bean (*Phaseolus vulgaris*) and tomato (*Solanum lycopersicum*) plants were planted  
136 every week and grown in an herbivore-free greenhouse, being watered two to three  
137 times a week. *T. urticae* populations were maintained on trays with 6-10 bean plants  
138 whereas those of *T. evansi* and *T. ludeni* were kept on tomato plants at 25°C, both with  
139 a 16 L: 8D photoperiod. Plant trays were changed every two weeks, placing old leaves  
140 on top of uninfested plants. Cultures were kept inside plastic boxes (28x39x28 cm),  
141 with an opening of 25x15 cm polyamide fabric (80 µm mesh width).

142

143

#### 144 **Experimental procedure**

145 Experiments were done on the plant species from which the female tested had been  
146 cultured. As in the literature there was no information on whether hybridization is  
147 possible between *T. urticae* and *T. ludeni*, we studied the outcome of a single  
148 heterospecific mating between these two species (the same analysis for *T. urticae* and  
149 *T. evansi* was performed in a previous experiment (Clemente et al. 2016)).  
150 Subsequently, we set out to study the heterospecific interactions between *T. urticae*  
151 and the invasive *T. evansi* and the resident *T. ludeni* species for which we analysed the  
152 outcome of mating with a heterospecific male before or after a conspecific male. Since  
153 we focused on interactions with *T. urticae* (the focal species of our study), we  
154 performed crosses between *T. urticae* males or females and *T. evansi* or *T. ludeni*  
155 males or females, but not between the two latter species. All experiments were  
156 performed in an acclimatized room at approximately 25°C.

157

158 **a) The outcome of a single heterospecific mating between *T. urticae* and *T. ludeni***

159 To determine whether hybridization occurred between *T. urticae* and *T. ludeni*, we  
160 measured the offspring sex-ratio resulting from single heterospecific matings. Given  
161 that only females develop from fertilized eggs, a whole-male offspring would mean  
162 unsuccessful hybridization. However, even in the absence of viable hybrids,  
163 heterospecific matings could result in aborted development of heterospecifically-  
164 fertilized eggs, meaning that females would produce fewer eggs. To test this, we  
165 compared the fecundity of *T. urticae* and *T. ludeni* females that mated with a  
166 heterospecific male to that of virgin females and of females mated with a conspecific  
167 male.

168 Females were collected from the stock populations, isolated at the quiescent  
169 deutonymph stage (which precedes their last moult before reaching adulthood), and  
170 kept in groups of approximately 15 females on bean (*Phaseolus vulgaris*) leaf discs  
171 (2 cm<sup>2</sup>) until emergence, to ensure their virginity. Adult males were collected from the  
172 same stock populations and kept isolated in leaf discs (2 cm<sup>2</sup>) for at least 24 hours  
173 before the assay, to ensure sperm replenishment. Females were placed individually in  
174 leaf discs (1 cm<sup>2</sup>) with either a conspecific or a heterospecific male and observed  
175 continuously until copulation occurred. Only matings that lasted at least 1 minute were  
176 considered effective (Boudreaux 1963). These experiments had the maximum duration  
177 of 2 hours. If no mating occurred within this time, individuals were discarded.  
178 Subsequently, females were isolated in a leaf disc (2 cm<sup>2</sup>), then transferred to a new  
179 disc every three days until the female's death. The number of eggs laid was registered  
180 after female transfer to a new leaf disc. Eggs were left to develop until adulthood



181 when offspring sex-ratio could be determined. With this data, we tested whether  
182 heterospecific matings affected (a) the mean daily fecundity and (b) offspring sex ratio  
183 (hence the proportion of fertilized offspring).

184

#### 185 **b) The outcome of heterospecific matings that precede or follow conspecific ones**

186 To determine the outcome of mating with a heterospecific male before or after a  
187 conspecific male between *T. urticae* and the other two species, we compared the  
188 fecundity and offspring sex ratio of those crosses to that of females that mated with  
189 two conspecific males. The experimental procedure was as described above, except  
190 that we let females mate with a conspecific or a heterospecific male, then placed the  
191 focal females with another male. We created the following mating sequences:  
192 conspecific-conspecific, conspecific-heterospecific and heterospecific-conspecific. The  
193 second mating occurred either immediately after the first mating (0 hours treatment)  
194 or 24 hours later. If no mating was observed within 2 hours, the females were  
195 discarded. We used the 0h and 24h mating intervals because the time interval was  
196 shown to affect the degree of sperm precedence in spider mites (Helle 1967).

197

#### 198 **Statistical analysis**

199 All analyses were carried out using R (version 3.3.2, R Development Core Team 2016).  
200 To analyse female fecundity within each species (*T. urticae*, *T. evansi* and *T. ludeni*), we  
201 used linear models (LM procedure), considering the mean number of eggs per day as  
202 the response variable (oviposition rate). To analyse offspring sex ratio within each  
203 species, we used generalized linear models (GLM procedure) with a quasi-binomial  
204 distribution – due to overdispersion of the data –, considering the number of female

205 and male offspring produced by each focal female as the response variables (analysed  
206 together with the function `cbind`).

207 For both types of analyses, we used as fixed factors the mating order (with  
208 three levels: the control treatment, where a female mated twice with conspecific  
209 males; an experimental treatment where the heterospecific male was the first to mate  
210 with the female; and another experimental treatment where the heterospecific male  
211 was the second to mate with the female) and the mating interval (with two levels:  
212 either 0h or 24h interval between matings). We also tested the interaction among  
213 these fixed factors. If the interaction was non-significant, a backward stepwise  
214 procedure was used to find the best simplified fitted model. We performed  
215 independent analyses for each species within each species pair (i.e. for *T. urticae* and  
216 *T. evansi* females in *T. urticae* versus *T. evansi* crosses; and for *T. urticae* and *T. ludeni*  
217 females in *T. urticae* versus *T. ludeni* crosses), as shown in Table 1.

218 We did a first block of experiments with the populations of *T. evansi* and *T.*  
219 *ludeni* collected in 2012 (block 1). For question b) we also did a second block of  
220 experiments with populations of those species from 2013 (block 2). In block 2 we did  
221 not repeat all treatments, but only the crosses that were not complete before the  
222 extinction of block 1 populations, as well as their respective controls – hence, there  
223 were no treatments that were only performed in block 2. Because of that, instead of  
224 including the factor block in the statistical models as a covariate, we did all the  
225 statistical analyses with block 1 only and with block 1 and block 2 together. Since the  
226 results were qualitatively similar (Table S1), here we present the results from the  
227 analysis with block 1 and block 2 together.

228

229 **Results**

230 **a) The outcome of a single heterospecific mating between *T. urticae* and *T.***

231 ***ludeni***

232 Crosses between *T. ludeni* and *T. urticae* resulted in 100% male offspring, indicating  
233 that hybrid production between these species is inexistent. The fecundity of *T. urticae*  
234 females that mated heterospecifically was not significantly different from that of virgin  
235 females or from that of females mated with a conspecific male ( $F_{2,78} = 1.886$ ,  $P = 0.1585$ ;  
236 Figure 1). On the other hand, the fecundity of *T. ludeni* females that mated with  
237 conspecifics or heterospecifics was significantly higher than that of virgin females  
238 ( $F_{2,66} = 1.886$ ,  $P = 0.1585$ ; Figure 1 and Table 1). Therefore, mating with heterospecific  
239 males does not result in the aborted fertilization of oocytes for *T. urticae* and *T. ludeni*  
240 females.

241

242 **b) The outcome of heterospecific matings that precede or follow conspecific**

243 **ones**

244 **(i) *T. urticae* vs *T. evansi***

245 The oviposition rate of *T. urticae* females that mated with either a conspecific and a  
246 heterospecific or with two conspecific mates varied significantly according to mating  
247 order in interaction with mating interval ( $F_{2,136} = 6.026$ ,  $P = 0.0031$ ). Specifically, it was  
248 higher for *T. urticae* females that mated with *T. evansi* males just before mating with a  
249 conspecific male than for any other cross at 0h mating interval ( $|t| = 4.964$ ,  $P < 0.0001$   
250 and  $|t| = 3.288$ ,  $P = 0.0009$ , in comparison with double conspecific matings and with  
251 matings with a conspecific followed by a mating with an heterospecific, respectively;  
252 Fig. 2a). At the 24h interval, however, mating combinations did not affect this trait. The

253 proportion of fertilized offspring (*i.e.*, daughters) of females *T. urticae* also varied  
254 significantly according to mating order in interaction with mating interval ( $F_{2,106} =$   
255 4.963,  $P = 0.0087$ ). But in contrast to the oviposition rate, this trait was affected at the  
256 24h interval only, in which mating with a *T. evansi* male after mating with a conspecific  
257 male resulted in a decrease in the proportion of fertilized offspring of *T. urticae*  
258 females, relative to other mating sequences ( $|t| = 5.362$ ,  $P < 0.0001$  and  $|t| = 5.103$ ,  $P$   
259  $< 0.0001$ , in comparison with double conspecific matings and with matings with an  
260 heterospecific followed by a mating with a conspecific male, respectively; Fig. 2b).

261 The mating order also affected differentially the oviposition rate of *T. evansi*  
262 females, depending on the interval between matings ( $F_{2,187} = 4.977$ ,  $P = 0.0078$ ). *T.*  
263 *evansi* females that mated with *T. urticae* males immediately after conspecific mates  
264 had reduced oviposition rate relative to other mating sequences at this time interval  
265 ( $|t| = 2.841$ ,  $P = 0.0050$  and  $|t| = 2.692$ ,  $P = 0.0078$  in comparison with double  
266 conspecific matings and with matings with a heterospecific followed by a mating with a  
267 conspecific male, respectively; Fig. 2c); however, if the heterospecific cross occurred  
268 24 hours before the conspecific cross, the oviposition rate of *T. evansi* females  
269 increased relative to double conspecific matings at this time interval ( $|t| = 2.948$ ,  $P =$   
270  $0.0036$ ; Fig. 2c). These crosses did not significantly affect sex ratio ( $F_{2,111} = 0.368$ ,  $P =$   
271  $0.6931$ ; Fig. 2d).

272

273 (ii) *T. urticae* vs *T. ludeni*

274 In crosses with the resident species (*T. ludeni*), the oviposition rate of *T. urticae*  
275 females varied significantly according to mating order in interaction with mating  
276 interval ( $F_{2,144} = 3.694$ ,  $P = 0.0273$ ). Specifically, we found that, at 0h interval, females

277 that mated first with a conspecific then with a heterospecific male had lower  
278 oviposition rate than females that mated first with a heterospecific then with a  
279 conspecific male ( $|t| = 2.736$ ,  $P = 0.0070$ ; Fig. 3a) At the 24h interval, the oviposition  
280 rate of females that mated first with a conspecific then with a heterospecific male was  
281 lower than that of double conspecific crosses. ( $|t| = 2.505$ ,  $P = 0.0134$ ; Fig. 3a). *T.*  
282 *urticae* females suffered no significant changes in offspring sex ratio from matings with  
283 *T. ludeni* males ( $F_{2,99} = 1.141$ ,  $P = 0.3237$ ; Figure 3b).

284 In *T. ludeni* females, the oviposition rate and the proportion of fertilized  
285 offspring varied significantly according to mating order in interaction with the mating  
286 interval ( $(F_{2,248} = 14.098$ ,  $P < 0.0001$  and  $F_{2,152} = 10.1064$ ,  $P < 0.0001$ , for oviposition rate  
287 and proportion of fertilized offspring respectively). Compared to the control  
288 treatment, *T. ludeni* females had lower oviposition rate when mating with *T. urticae*  
289 males immediately before conspecifics males ( $|t| = 2.605$ ,  $P = 0.0097$ ; Fig. 3c). At the  
290 24 hour interval, the conspecific crosses yielded higher oviposition rate than all other  
291 crosses in this time interval ( $|t| = 4.646$ ,  $P < 0.0001$  and  $|t| = 3.805$ ,  $P = 0.0002$ , in  
292 comparison with females mating with a conspecific before an heterospecific male and  
293 females mating with an heterospecific before mating with a conspecific, respectively;  
294 Fig. 3c). Additionally, when *T. ludeni* females mated with *T. urticae* males 24h after  
295 conspecific matings, the proportion of fertilized offspring was significantly lower than  
296 that of other crosses at this time interval ( $|t| = 4.084$ ,  $P < 0.0001$  and  $|t| = 3.586$ ,  $P =$   
297  $0.0005$ , in comparison with double conspecific matings and with females mating with a  
298 heterospecific before mating with a conspecific, respectively; Figure 3d). The mating  
299 sequence had no effect on the sex ratio at the 0h interval.

300

301 **Discussion**

302 In this study, we investigated the consequences of mating with heterospecifics for the  
303 fertilization success and offspring viability in a system composed of three spider-mite  
304 species. We found that heterospecific matings between *T. urticae* and *T. ludeni* did not  
305 result in fertilized offspring (i.e., females), nor did it have any negative effects on egg  
306 viability, as shown for matings between *T. urticae* and *T. evansi* (Sato et al. 2014,  
307 Clemente et al. 2016). In fact, *T. ludeni* females that mate with *T. urticae* males  
308 produce more (male) offspring than virgin *T. ludeni* females. Second, the effects of  
309 heterospecific matings on the outcome of previous or subsequent matings with  
310 conspecifics were highly dependent on the species pair involved, on the trait measured  
311 and on the timing and order of mating events. Despite strong effects of particular  
312 mating sequences, the results taken as a whole suggest that the net effect of  
313 reproductive interactions between species are relatively weak.

314 Positive effects of interspecific reproductive interactions were found for  
315 fecundity. This can be due to a stimulation of oogenesis by the sperm of heterospecific  
316 males, increasing the availability of oocytes to subsequent matings with conspecifics.  
317 Indeed, oogenesis is stimulated by conspecific sperm in several species (Qazi et al.  
318 2003, Xu and Wang 2011). This could also be the case with heterospecific sperm. If so,  
319 it could explain the higher fecundity found in crosses between *T. urticae* and *T. evansi*.  
320 In fact, earlier studies have documented that interactions with heterospecific males  
321 are not always negative. In some gynogenetic species, heterospecific mating is a  
322 prerequisite for embryogenesis (Gumm and Gabor 2005, Schlupp 2010). Moreover, in  
323 some invertebrate species, females receive nuptial gifts from heterospecific males  
324 (Vahed 1998, Costa-Schmidt and Machado 2012). However, to our knowledge, this is

325 the first time that an increase in fecundity following a heterospecific mating is  
326 described in the literature. Such effects may thus be rare. Still, earlier studies may have  
327 overlooked them because they have not examined the roles of the order of mating in  
328 the outcome of heterospecific mating interactions.

329         Nonetheless, we also detected several negative effects of mating with  
330 heterospecifics, as found in most studies of reproductive interference (Gröning and  
331 Hochkirch 2008, Kishi 2015). We found both a reduction in the number of eggs laid and  
332 a decrease in fertilization success (i.e., offspring sex ratio). However, the incidence of  
333 these two effects varied according to the species involved, the order of matings and  
334 the time interval. Whereas effects on fecundity were found in several mating  
335 sequences, an effect on fertilization success was found only when the heterospecific  
336 male mated with the female 24 hours after the conspecific male. This is at odds with  
337 expectations stemming from findings on conspecific matings, which show (a) first-male  
338 precedence and (b) exceptions to this rule only if the second male mates immediately  
339 after the first (Helle 1967). Therefore, the mechanisms underlying sperm displacement  
340 by heterospecific males in spider mites should be investigated.

341         This also suggests that first male precedence found in conspecific matings  
342 cannot be extrapolated to matings involving heterospecific sperm. This contrasts with  
343 the recent finding that effects of heterospecific matings in *Drosophila* could be  
344 predicted from the harmful effects of conspecific mates (Yassin and David 2015), and  
345 that genes involved in conspecific male precedence also affect sperm precedence in  
346 multiple matings involving heterospecifics (Civetta and Finn 2014). This indicates that  
347 the equivalence of effects of conspecific and heterospecific sperm on the outcome of

348 conspecific matings is dependent on the type of effect and/or the species involved in  
349 the interaction.

350         Since effects of heterospecific matings depend on the order and timing of  
351 occurrence, the outcome of interspecific reproductive interactions will depend on the  
352 frequency with which those different types of matings occur in nature. This, in turn,  
353 will depend on the discrimination abilities between species. First, these interactions  
354 will occur only if species discrimination is weak. This, indeed, has been explicitly  
355 demonstrated for the *T. evansi*/*T. urticae* interaction (Clemente et al. 2016), but not  
356 for *T. ludeni*/*T. urticae*. Still, these species do mate with heterospecifics under no  
357 choice scenarios, as shown here, hence the scope for the occurrence of reproductive  
358 interference does exist.

359         What then, would be the relative frequency of the mating sequences tested  
360 here? In spider mites, conspecific males often guard quiescent females (*i.e.*, the last  
361 larval stage before becoming adult female), to ensure mating immediately after  
362 emergence. If males guard preferentially conspecific females, as shown in other spider  
363 mite species pairs (Collins et al. 1993, Takafuji et al. 1997), heterospecific matings will  
364 occur more often after rather than before conspecific ones. Moreover, we have shown  
365 that *T. urticae* females become less receptive to both conspecific and heterospecific  
366 matings if the first mating has occurred 24h before the second (Clemente et al. 2016).  
367 Hence, this leads to the prediction that the most common mating sequence among  
368 these species will be a heterospecific mating immediately following a conspecific one.  
369 Under those circumstances the only effect of heterospecific matings is a fecundity  
370 reduction in *T. evansi* upon mating with *T. urticae*. This would mean that the invasive  
371 species suffers more from reproductive interference than the resident.



372 Even assuming that all mating combinations do occur, reproductive interactions  
373 between *T. urticae* and *T. evansi* can be positive or negative for the two species,  
374 depending on the mating sequence. Therefore, reproductive interference cannot be  
375 invoked to explain the exclusion of *T. urticae* in habitats with *T. evansi* (Ferragut et al.  
376 2013, Sarmiento et al. 2011b). Other factors may contribute to this exclusion, as the  
377 production of a dense web by *T. evansi*, which prevents heterospecifics from accessing  
378 the surface of the leaves to feed and oviposit (Sarmiento et al. 2011b). Importantly,  
379 however, we show that the occurrence and strength of reproductive interference  
380 cannot be assessed with the unique evaluation of the outcome of a specific type of  
381 reproductive interaction. The different types of mating combinations – the order and  
382 interval between matings – have great influence on the overall outcome of  
383 heterospecific interactions and on the relative frequency of such events. This confirms  
384 the importance of using complete experimental designs on the detection and  
385 characterization of reproductive interference.

386

### 387 **Acknowledgements**

388 The authors wish to thank Yukie Sato and Maurice W. Sabelis for helpful discussions  
389 during the early stages of this work. These experiments and Inês Santos were funded  
390 by Portuguese National Funds through an FCT-ANR project (FCT-ANR//BIA-  
391 EVF/0013/2012) to SM and Isabelle Olivieri. SHC and LRR had PhD fellowships funded  
392 by FCT (SFRH/ BD/ 90156/2012 and SFRH/BD/87628/2012, respectively). SAMV and RP  
393 had Post-doctoral fellowships from FCT, (SFRH/BPD/66042/2009) and (SFRH / BPD /  
394 42801 /2008) respectively. The authors declare no conflict of interest.

395

396 **FIGURE LEGENDS**

397

398 **Figure 1** | Average daily fecundity of virgin females, and of females that have mated  
399 with a conspecific or a heterospecific male. Tu: *T. urticae* males or females; Tl: *T. ludeni*  
400 males or females. Grey bars: matings involving *T. urticae* females; white bars: matings  
401 involving *T. ludeni* females. Error bars represent the standard errors of the mean.  
402 Numbers on the bottom of bars represent the sample size for each type of mating.

403

404 **Figure 2** | Average daily fecundity and estimated offspring sex ratio resulting from  
405 interactions between *T. urticae* (a, b; grey solid bars) and *T. evansi* (c,d; striped bars)  
406 females with conspecific and heterospecific males. In each plot, bars on the left side of  
407 the dotted straight line correspond to treatments where second matings occurred  
408 immediately (0h) after the first one; bars on the right side correspond to treatments  
409 where second matings occurred 24h after the first one. "1st M": first male that mated  
410 with the female; "2nd M": second male. The interval indicates the time of occurrence  
411 of the second mating, i.e., if immediately after the first mating (0h) or 24h later. "Tu":  
412 *T. urticae* males; "Te": *T. evansi* males. Letters above the bars indicate significant  
413 differences among treatments (small letters: among crosses occurring with a 0h  
414 interval; capital letters: among crosses occurring with a 24h interval). Error bars  
415 represent the standard errors of the mean. For offspring sex ratio, we obtained the  
416 estimates of the probability of being female and correspondent standard errors of the  
417 mean from the statistical GLM models. This takes into account sex ratio variation  
418 among females, as well as the quasi-binomial correction for overdispersion of the data.  
419 Numbers on the bottom of bars represent the sample size for each type of mating.

420

421 **Figure 3** | Average daily fecundity and estimated offspring sex ratio resulting from  
422 interactions between *T. urticae* (plots a, b; grey bars) and *T. ludeni* (plots c, d; white  
423 bars) females with conspecific and heterospecific males. In each plot, bars on the left  
424 side of the dotted line correspond to treatments where second matings occurred  
425 immediately (0h) after the first one; bars on the right side correspond to treatments  
426 where second matings occurred 24h after the first one. "1st M": first male that mated  
427 with the female; "2nd M": second male. The interval indicates the time of occurrence  
428 of the second mating, i.e., if immediately after the first mating (0h) or 24h later. "Tu":  
429 *T. urticae* males; "Tl": *T. ludeni* males. Letters above the bars indicate the significant  
430 differences between treatments (small letters: among crosses occurring with a 0h  
431 interval; capital letters: among crosses occurring with a 24h interval. Error bars  
432 represent the standard errors of the mean. For offspring sex ratio, we obtained the  
433 estimates of the probability of being female and correspondent standard errors of the  
434 mean from the statistical GLM models. This takes into account sex ratio variation  
435 among females, as well as the quasi-binomial correction for overdispersion of the data.  
436 Numbers on the bottom of bars represent the sample size for each type of mating.

437

438

439

440



442 **References**

- 443 Alpedrinha J. and Magalhães S. 2016. Sex Allocation: l'enfer c'est les autres? – Curr.  
444 Biol. 26: R476-R478.
- 445 Arnqvist, G. and Rowe, L. 2005. Sexual Conflict. – Princeton University Press,  
446 Princeton.
- 447 Ben-David, T. et al. 2009. Asymmetric reproductive interference between two closely  
448 related spider mites: *Tetranychus urticae* and *T. turkestanii* (Acari: Tetranychidae). –  
449 Exp. Appl. Acarol. 48: 213-227.
- 450 Braig, H. R. et al. 1998. Cloning and Characterization of a Gene Encoding the Major  
451 Surface Protein of the Bacterial Endosymbiont *Wolbachia pipientis*. – J. Bacteriol. 180:  
452 2373–2378.
- 453 Breeuwer, J. A. 1997. *Wolbachia* and cytoplasmic incompatibility in the spider mites  
454 *Tetranychus urticae* and *T. turkestanii*. – Heredity 79: 41–47.
- 455 Boubou, A. et al. 2012. Test of colonisation scenarios reveals complex invasion history  
456 of the red tomato spider mite *Tetranychus evansi*. – PLoS One 7: 35601.
- 457 Boudreaux, H. B. 1963. Biological aspects of some phytophagous mites. – Annu. Rev.  
458 Entomol. 8: 137–154.
- 459 Burdfield-Steel, E. R. and Shuker, D. M. 2011. Reproductive interference. – Curr. Biol.  
460 21: 450–451.

- 461 Civetta, A. and Finn, S. 2014. Do candidate genes mediating conspecific sperm  
462 precedence affect sperm competitive ability within species? A test case in *Drosophila*.  
463 – *G3 (Bethesda)* 4: 1701-1707.
- 464 Clemente, S. H. et al. 2016. Incomplete species recognition entails few costs in spider  
465 mites, despite first-male precedence. – *Behav. Ecol.Sociobiol.* in press. DOI  
466 10.1007/s00265-016-2124-0
- 467 Collins, R. D. et al. 1993. Guarding behavior and reproductive isolation in two  
468 tetranychid mite species (Acari: Tetranychidae). – *Ann. Entomol. Soc. Am.* 86: 111-116.
- 469 Collins, R. and Margolies, D. 1994. The effect of interspecific mating on sex ratios in the  
470 twospotted spider mite and the Banks grass mite (Acarina: Tetranychidae). –  
471 *J. Insect Behav.*, 8: 189–206.
- 472 Costa-Schmidt, L. E. and Machado, G. 2012. Reproductive interference between two  
473 sibling species of gift-giving spiders. – *Anim. Behav.* 84: 1201-1211.
- 474 Crampton, W. G. et al. 2011. Reproductive character displacement and signal ontogeny  
475 in a sympatric assemblage of electric fish. – *Evolution* 65: 1650-1666.
- 476 Crowder, D. W. et al. 2010. Plasticity in mating behaviour drives asymmetric  
477 reproductive interference in whiteflies. – *Anim. Behav.* 79: 579-587.
- 478 Del Re, A. C. 2013. compute.es: Compute Effect Sizes. R package version 0.2-2.  
479 <http://cran.r-project.org/web/packages/compute.es>.

480 delBarco-Trillo, J. and Johnston R. 2010. Adult female hamsters require long and  
481 sustained exposures to heterospecific males to avoid interspecific mating. – *Evol. Ecol.*  
482 25: 391–401.

483 Escudero, L. and Ferragut, F. 2005. Life-history of predatory mites *Neoseiulus*  
484 *californicus* and *Phytoseiulus persimilis* (Acari: Phytoseiidae) on four spider mite  
485 species as prey, with special reference to *Tetranychus evansi* (Acari: Tetranychidae). –  
486 *Biol. Control* 32: 378-384.

487 Ferragut, F. et al. 2013. The invasive spider mite *Tetranychus evansi* (Acari:  
488 Tetranychidae) alters community composition and host-plant use of native relatives. –  
489 *Exp. Appl. Acarol.* 60: 321-341.

490 Godinho, D. P. et al. 2016. Down-regulation of plant defence in a resident spider mite  
491 species and its effect upon con-and heterospecifics. – *Oecologia* 180: 161-167.

492 Gotoh, T. et al. 2015. Development and reproduction of five *Tetranychus* species  
493 (Acari: Tetranychidae): Do they all have the potential to become major pests? – *Exp.*  
494 *Appl. Acarol.* 66: 453-479.

495 Grbić, M. et al. 2011. The genome of *Tetranychus urticae* reveals herbivorous pest  
496 adaptations. – *Nature* 479: 487-492.

497 Gröning, J. and Hochkirch, A. 2008. Reproductive interference between animal species.  
498 – *Q. Rev. Biol.* 83: 257-282.

- 499 Gumm, J. M. and Gabor, C. R. 2005. Asexuals looking for sex: conflict between species  
500 and mate-quality recognition in sailfin mollies (*Poecilia latipinna*). – *Behav. Ecol.*  
501 *Sociobiol.* 58: 558–565.
- 502 Helle, W. 1967. Fertilization in the two-spotted spider mite (*Tetranychus urticae*:  
503 *Acari*). – *Entomol. Exp. Appl.* 10: 103–110.
- 504 Hochkirch A., Gröning J. & Bücker A. 2007. Sympatry with the devil: reproductive  
505 interference could hamper species coexistence. *Journal of Animal Ecology* 76(4): 633–  
506 642.
- 507 Hurtado M. A. et al. 2008. Sequence analysis of the ribosomal internal transcribed  
508 spacers region in spider mites (Prostigmata: Tetranychidae) occurring in citrus orchards  
509 in Eastern Spain: use for species discrimination. – *Ann. Appl. Biol.* 153: 167-174.
- 510 Kishi, S. 2015. Reproductive interference in laboratory experiments of interspecific  
511 competition. – *Popul. Ecol.* 57: 283-292.
- 512 Kishi, S. et al. 2009. Reproductive interference determines persistence and exclusion in  
513 species interactions. – *J. Anim. Ecol.* 78: 1043-1049.
- 514 Kishi, S. and Nakazawa, T. 2013. Analysis of species coexistence co-mediated by  
515 resource competition and reproductive interference. – *Popul. Ecol.* 55: 305-313.
- 516 Kyogoku, D. and Nishida, T. 2013. The mechanism of the fecundity reduction in  
517 *Callosobruchus maculatus* caused by *Callosobruchus chinensis* males. – *Popul. Ecol.* 55:  
518 87-93.



- 519 Kyogoku, D. 2015. Reproductive interference: ecological and evolutionary  
520 consequences of interspecific promiscuity. – *Popul. Ecol.* 57: 253-260.
- 521 Lievens, E. J. et al. 2016. Maladaptive Sex Ratio Adjustment in the invasive brine  
522 shrimp *Artemia franciscana*. – *Curr. Biol.* 26: 1463- 1467.
- 523 Macke, E. et al. 2012. Mating modifies female life history in a haplodiploid spider mite.  
524 – *Am. Nat.* 179: E147-E162.
- 525 Matsuda, T. et al. 2013. DNA-based identification of spider mites: molecular evidence  
526 for cryptic species of the genus *Tetranychus* (Acari: Tetranychidae). – *J. Econ. Entomol.*  
527 106: 463-472.
- 528 McPeck, M.A., and Gavrillets, S. 2006. The evolution of female mating preferences:  
529 differentiation from species with promiscuous males can promote speciation. –  
530 *Evolution* 60: 1967-1980.
- 531 Nakagawa, S. and Poulin, R. 2012. Meta-analytic insights into evolutionary ecology: an  
532 introduction and synthesis. – *Evol. Ecol.* 26: 1085–1099.
- 533 Navajas, M. 1998. Host plant associations in the spider mite *Tetranychus urticae* (Acari:  
534 Tetranychidae): insights from molecular phylogeography. – *Exp. Appl. Acarol.* 22: 201-  
535 214.
- 536 Navajas, M. et al. 2013. Review of the invasion of *Tetranychus evansi*: biology,  
537 colonization pathways, potential expansion and prospects for biological control. – *Exp.*  
538 *Appl. Acarol.* 59: 43-65.

- 539 Noriyuki, S. et al. 2012. Asymmetric reproductive interference between specialist and  
540 generalist predatory ladybirds. – J. Anim. Ecol. 81: 1077-1085.
- 541 Qazi M. C. B. et al. 2003. The developments between gametogenesis and fertilization:  
542 ovulation and female sperm storage in *Drosophila melanogaster*. – Dev. Biol. 256: 195–  
543 211.
- 544 Sarmento, R. A. et al. 2011a. A herbivore that manipulates plant defence. – Ecol. Lett.  
545 14: 229-236.
- 546 Sarmento, R. A. et al. 2011b. A herbivorous mite down-regulates plant defence and  
547 produces web to exclude competitors. – PLoS One 6: 23757.
- 548 Sato, Y. et al. 2014. Testing for reproductive interference in the population dynamics of  
549 two congeneric species of herbivorous mites. – Heredity 113: 495–502.
- 550 Sato, Y. et al. 2016. Why do males choose heterospecific females in the red spider  
551 mite? – Exp. Appl. Acarol. 68: 21-31.
- 552 Satoh, Y. et al. 2001. Mating strategy of spider mite, *Tetranychus urticae* (Acari:  
553 Tetranychidae) males: Postcopulatory guarding to assure paternity. – Appl. Entomol.  
554 Zool. 36: 41–45.
- 555 Schlupp, I. 2010. Mate Choice and the Amazon Molly: How Sexuality and Unisexuality  
556 Can Coexist. – J. Hered. 101: S55–S61.
- 557 Servedio, M. R. and Kirkpatrick, M. 1997. The effects of gene flow on reinforcement. –  
558 Evolution 51: 1764-1772.

- 559 Takafuji, A. 1986. Effectiveness of second mating for two incompatible types of the  
560 citrus red mite, *Panonychus citri* (McGregor). – Res. Popul. Ecol. 28: 91-101.
- 561 Takafuji, A. et al. 1997. Reproductive interference and its consequences for the  
562 competitive interactions between two closely related *Panonychus* spider mites. – Exp.  
563 Appl. Acarol. 21: 379-391.
- 564 Takakura, K. I. et al. 2015. Conflicting intersexual mate choices maintain interspecific  
565 sexual interactions. – Popul. Ecol. 57: 261-271.
- 566 Vahed, K. 1998. The function of nuptial feeding in insects: review of empirical studies.  
567 – Biol. Rev. Camb. Philos. 73: 43–78.
- 568 Vala, F. et al. 2000. *Wolbachia*-induced hybrid breakdown in the two-spotted spider  
569 mite *Tetranychus urticae* Koch. – P. Roy. Soc. Lond. B Bio. 267: 1931-1937.
- 570 Viechtbauer, W. 2010. Conducting meta-analyses in R with the metafor package. – J.  
571 Stat. Softw. 36: 1-48.
- 572 Wang, P. et al. 2010. Crossing experiments and behavioral observations reveal  
573 reproductive incompatibility among three putative species of the whitefly *Bemisia*  
574 *tabaci*. – Insect Sci. 17: 508-516.
- 575 Yassin, A. and David, J. R. 2016. Within-species reproductive costs affect the  
576 asymmetry of satyriation in *Drosophila*. – J. Evol. Biol. 29: 455-60.
- 577 Xu, J. and Wang, Q. 2011. Seminal fluid reduces female longevity and stimulates egg  
578 production and sperm trigger oviposition in a moth. – J. Insect Physiol. 57: 385-390.

579

580 **Supporting Information**

581 The following Supporting Information has been made available in the online version of  
582 this article.

583 Table S1 |Statistical tests and contrasts for the comparisons of fecundity and offspring  
584 sex ratio in crosses between conspecific and heterospecific males and females, using  
585 data from Bloc 1 or Blocs 1+2.

586

Fig.1

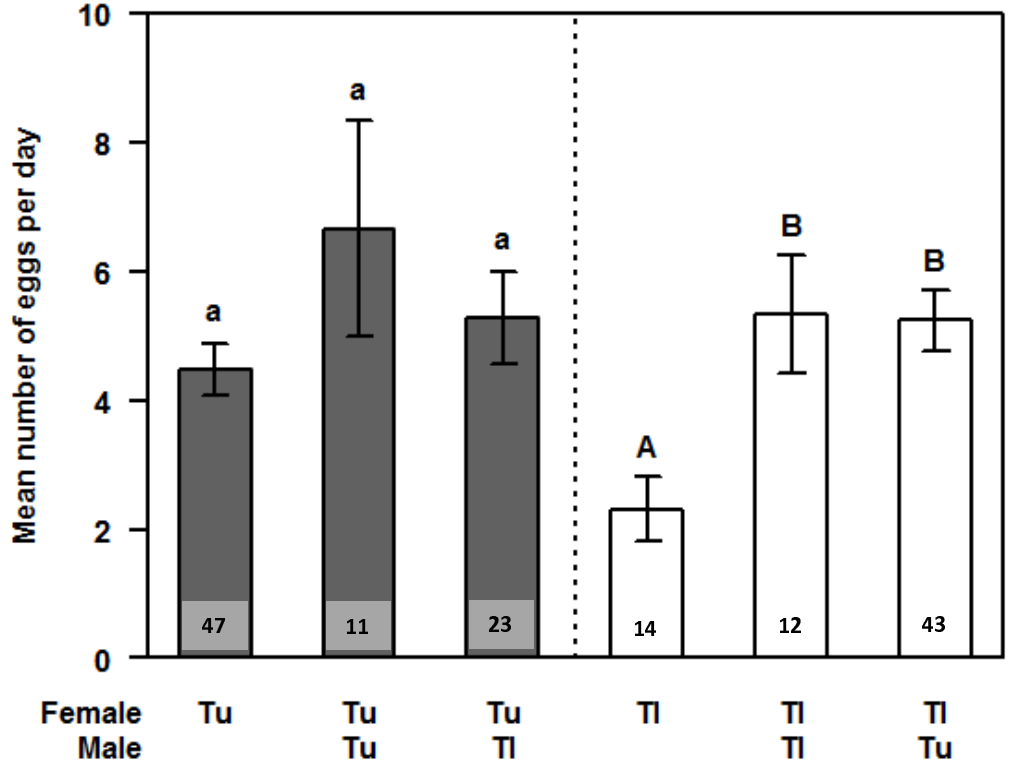

*T. urticae* versus *T. evansi*

Fig.2

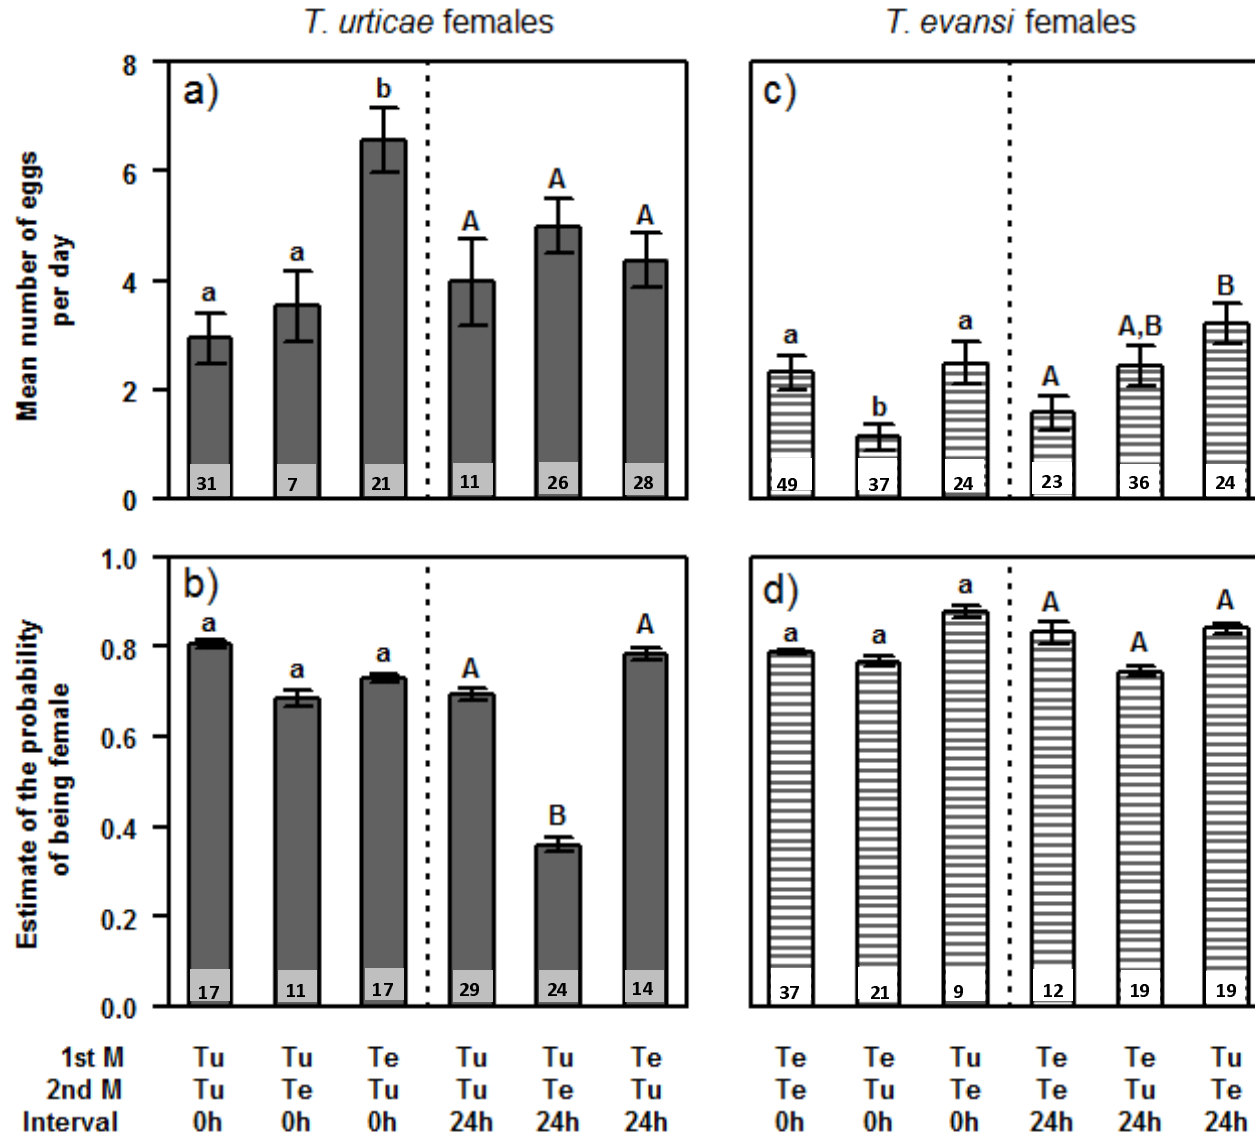

Fig.3

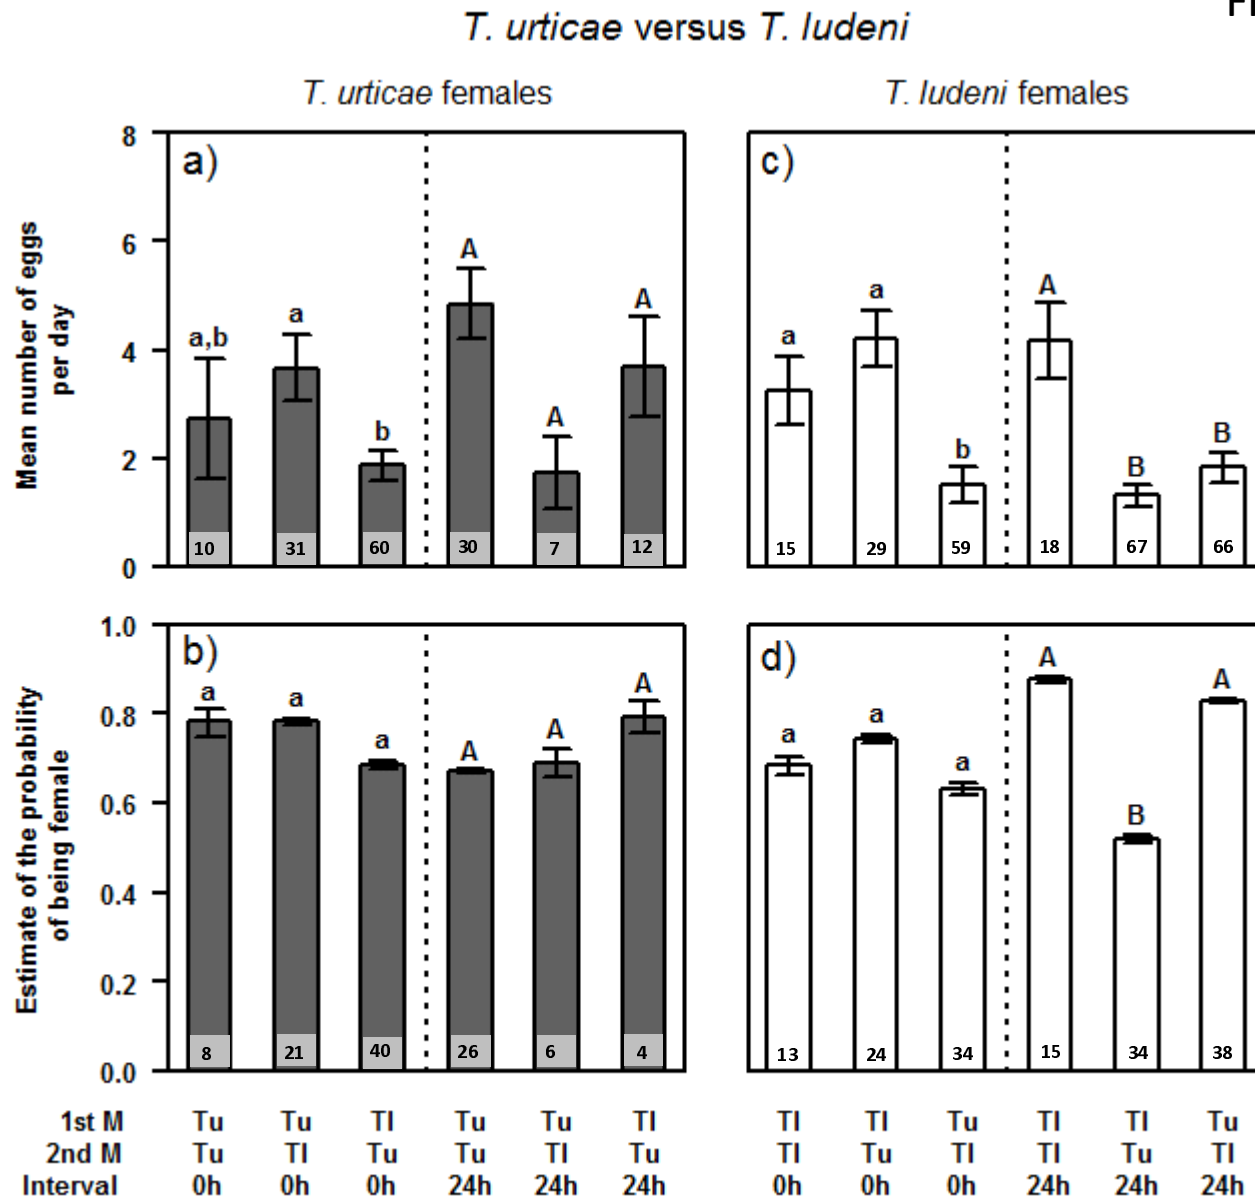

Source: http://www.biorxiv.org/content/10.1101/113274v3.full.pdf
